# Supplementary material for: NIH/3T3 Fibroblasts Selectively Activate T Cells Specific for Posttranslationally Modified Collagen Type II
Source: MDPI journal article supplement (doi:10.3390/ijms241310811), 2023-06-28
Supplement: s1 [file s1]

## Supplementary Materials

# NIH/3T3 Fibroblasts Selectively Activate T Cells Specific for Posttranslationally Modified Collagen Type II

Balik Dzhambazov <sup>1,\*</sup>, Tsvetelina Batsalova <sup>1</sup>, Patrick Merky <sup>2</sup>, Franziska Lange <sup>3</sup> and Rikard Holmdahl <sup>4</sup>
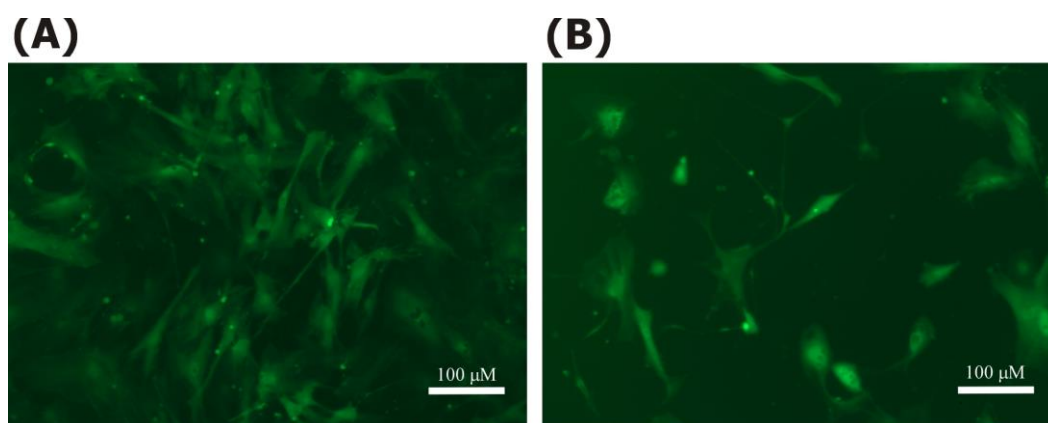

**Figure S1.** Expression of the Aq molecule on QB dermal fibroblasts (A) and QB synovial fibroblasts (B). After adhesion for 24 hours, the cells were stained with biotin labeled anti-mouse Aq (clone KH116) and FITC Streptavidin for 15 minutes at 37°C in dark. Photomicrographs show fluorescence from the respective area. Bar 100 μm.

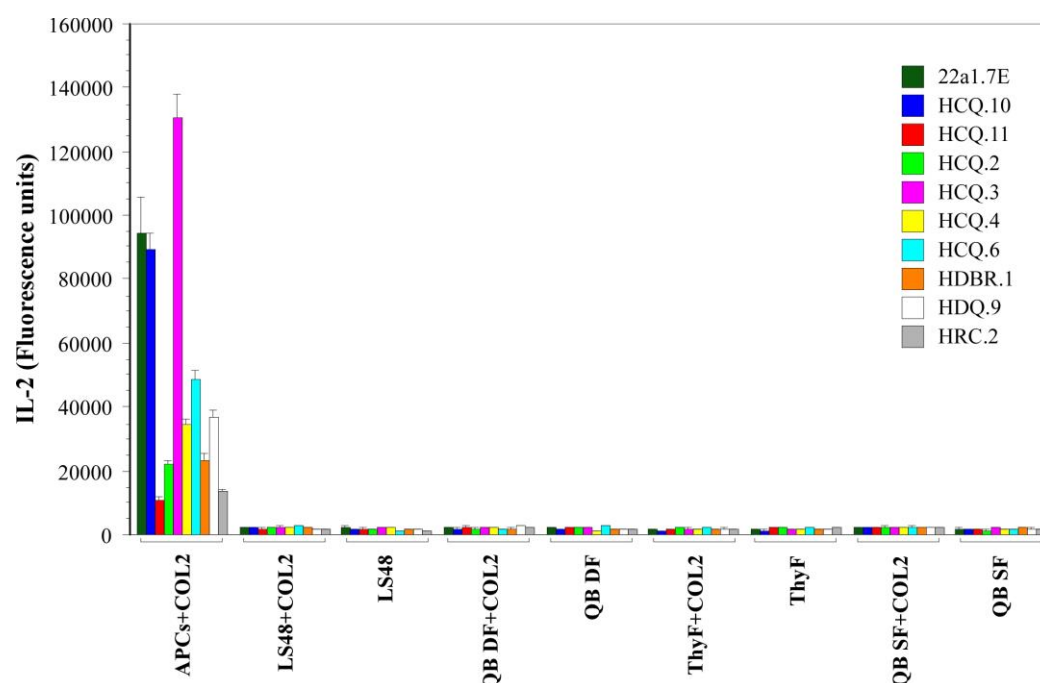

**Figure S2.** Antigen-presenting capacity of different types of fibroblasts. Antigen-presentation ability of LS48, synovial, dermal and thymic fibroblasts was evaluated by measuring IL-2 levels in culture medium following 24 h co-culture of fibroblasts with COL2-specific T-cell hybridomas and 50 μg/mL COL2. The mean of triplicate measurements for each sample is shown.
